# Supplementary material for: Molybdenum sulfide-2D nanosheets offering multiple metallic sites enable different sugar epimerization reactions to rare sugars in water
Source: Royal Society of Chemistry journal article supplement (doi:10.1039/d3re00321c), 2023-01-01
Supplement: d3re00321c1.pdf [file d3re00321c1.pdf]

## Supplementary Information

### **Molybdenum sulfide-2D nanosheets offering multiple metallic sites enable different sugar epimerization reactions to rare sugars in water**

Senthil Murugan Arumugam,<sup>1</sup> Sangeeta Mahala,<sup>1,2</sup> Bhawana Devi,<sup>1,2</sup> Sandeep Kumar,<sup>1</sup> Ravi Kumar Kunchala<sup>1</sup> and Sasikumar Elumalai<sup>1,\*</sup>

<sup>1</sup> *Chemical Engineering Division, DBT-Center of Innovative and Applied Bioprocessing, Mohali, Punjab 140306 India*

<sup>2</sup> *Department of Chemical Sciences, Indian Institute of Science Education and Research, Mohali, Punjab 140306 India*

Corresponding author information: [sasikumar@ciab.res.in](mailto:sasikumar@ciab.res.in) (S. Elumalai)

Tel: +91-172-5221-444

Total pages: 17

Total Tables: 11

Total Figures: 14

## Mathematical expressions

$$\text{Sugar conversion (wt. \%)} = \frac{(\text{Initial wt. of sugar} - \text{Remaining wt. of sugar after completion of reaction})}{\text{Initial wt. of Sugar}} \times 100$$

----- (S1)

$$\text{Product yield (wt. \%)} = \frac{\text{Wt. of product formation}}{\text{Initial wt. of sugar (reactant)}} \times 100$$

----- (S2)

$$\text{Product selectivity (wt. \%)} = \frac{\text{Wt. of product formation}}{\text{Converted wt. of reactant}} \times 100$$

----- (S3)

### Reaction kinetics

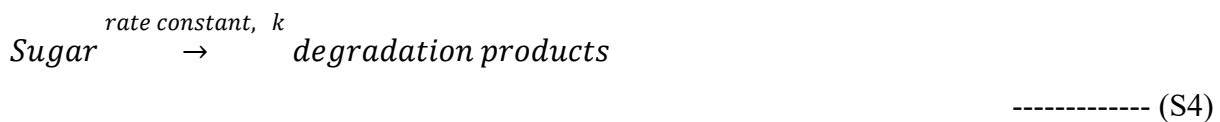

Where, sugar can be glucose and fructose.

### Kinetic equation of the first-order reaction

$$\ln \left\{ \frac{[\text{Sugar}]_t}{[\text{Sugar}]_0} \right\} = -k \times \text{time (sec)}$$

----- (S5)

Where, sugar can be glucose and fructose.  $[\text{Sugar}]_t$  and  $[\text{Sugar}]_0$  represent the final and initial reactant (sugar) concentration at time  $t$ .  $k$  is the observed rate constant of reaction (disappearance of sugar).

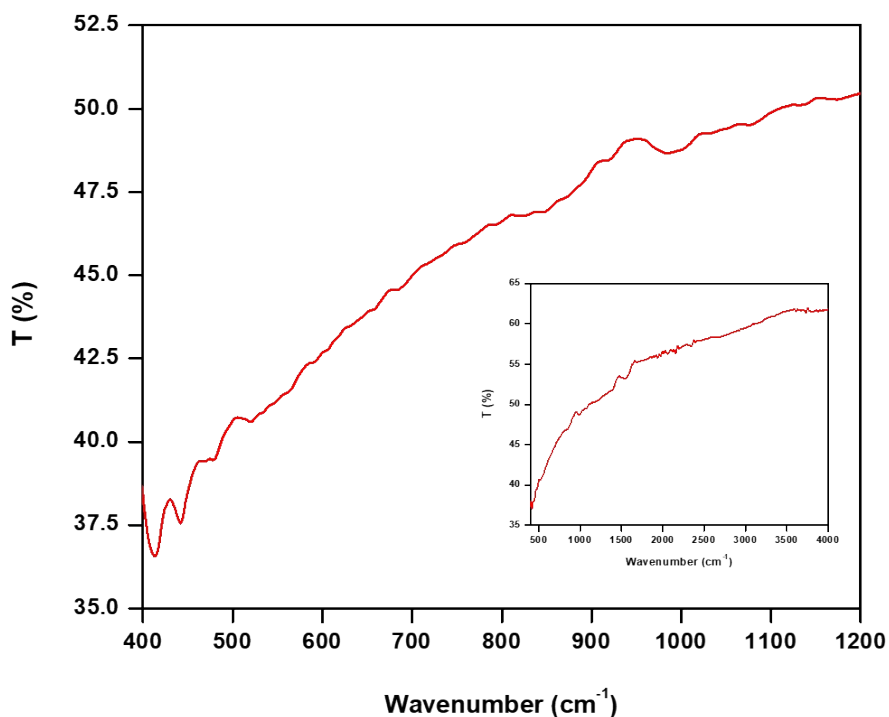

**Figure S1:** ATR-FTIR spectrum of the as-synthesised MoS<sub>2</sub> nanosheets in the 400-1200 cm<sup>-1</sup> range. Inset: full spectrum.

**Table S1:** Comparative XPS analysis data of fresh and recycled catalysts of both epimerization reactions.

| S.No. | Catalyst | Molybdenum (%) <sup>a</sup> |                     |                     | Sulphur (%) <sup>a</sup> |                              |                 | Mo <sup>b</sup><br>(wt.%) |
|-------|----------|-----------------------------|---------------------|---------------------|--------------------------|------------------------------|-----------------|---------------------------|
|       |          | Mo <sup>6+</sup>            | 1T-MoS <sub>2</sub> | 2H-MoS <sub>2</sub> | S <sup>2-</sup>          | S <sub>2</sub> <sup>2-</sup> | S <sup>6+</sup> |                           |
| 1     | Fresh    | 8.7                         | 59.6                | 31.5                | 70.9                     | 15.2                         | 13.8            | --                        |
| 2     | R-MS-1   | 4.1                         | 51.6                | 44.2                | 76.5                     | 23.5                         | n.a.            | < 0.1                     |
| 3     | R-MS-2   | 3.3                         | 48.6                | 47.9                | 74.0                     | 25.9                         | n.a.            | < 0.2                     |

<sup>a</sup>Data calculated from XPS studies; <sup>b</sup>Mo leaching content calculated from ICP-MS studies; R-MS-1 catalyst collected from glucose epimerization reaction; R-MS-2 catalyst collected from fructose epimerization reaction; n.a. not available.

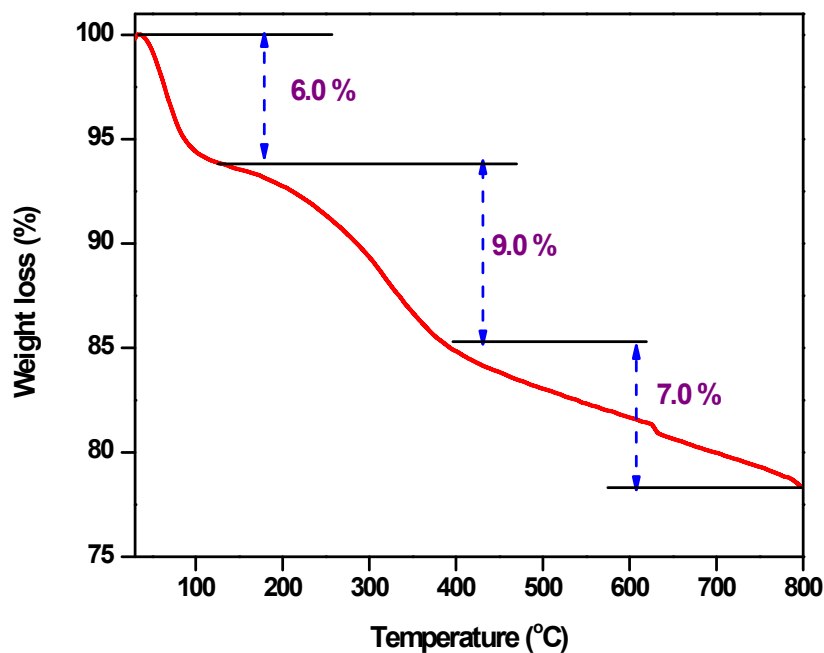

**Figure S2:** TGA analysis report of the as-synthesized MoS<sub>2</sub> nanosheets.

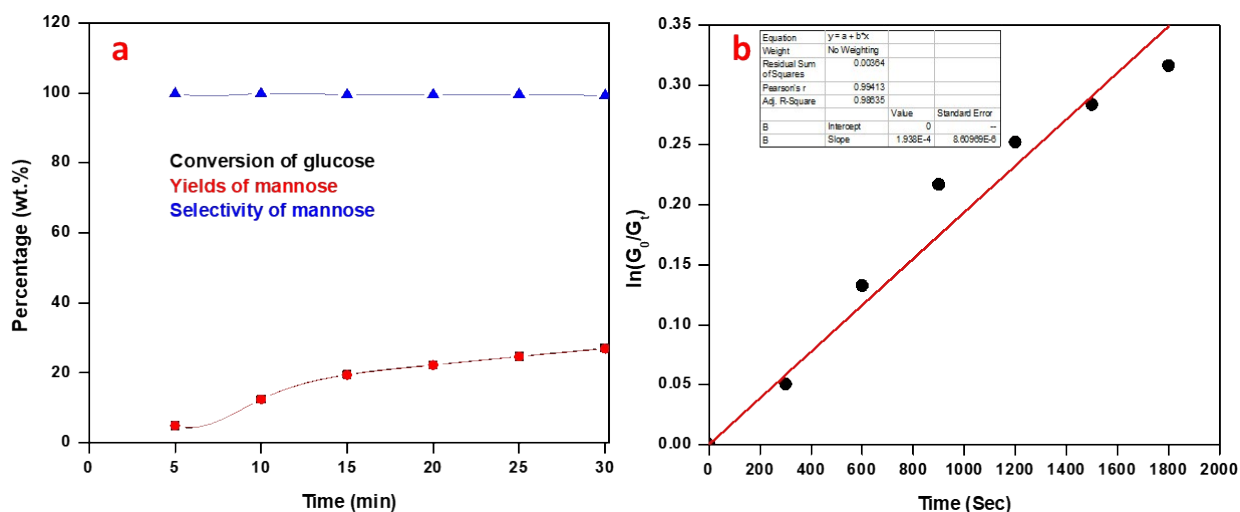

**Figure S3:** Reaction kinetics of glucose into mannose over MoS<sub>2</sub>: (a) kinetic profile (at 100 °C and 10% wt. MoS<sub>2</sub> load on glucose) and (b) ln[Glu<sub>0</sub>/Glu<sub>t</sub>] vs. *t* plot for first-order rate constant determination.

**Table S2:** Product distribution during glucose epimerization over MoS<sub>2</sub> nanosheets with respect to temperature.

| Temp (°C) | Conv <sub>Glu</sub> (%) | Yield <sub>Mann</sub> (%) | Yield <sub>Fruc</sub> (%) | Carbon balance (%) | TON  | TOF (×10 <sup>-2</sup> min <sup>-1</sup> ) |
|-----------|-------------------------|---------------------------|---------------------------|--------------------|------|--------------------------------------------|
| 80        | 28.2                    | 27.0                      | n.d.                      | 95.7               | 2.70 | 2.2                                        |
| 90        | 31.1                    | 27.4                      | n.d.                      | 88.1               | 2.74 | 2.3                                        |
| 100       | 34.7                    | 29.3                      | 0.5                       | 85.9               | 2.93 | 2.4                                        |
| 110       | 44.0                    | 27.9                      | 0.8                       | 65.2               | 2.79 | 2.3                                        |
| 120       | 55.6                    | 26.0                      | 1.5                       | 49.5               | 2.60 | 2.1                                        |

Conv-conversion, Glu-glucose, Mann-mannose and Fruc-fructose. Reaction conditions: 10% wt. catalyst to glucose and 120 min in water. N.d.-not detected. TON-turn over number is calculated as moles of reactant consumed per mole of catalyst. TOF-turn over frequency is calculated as moles of reactant consumed per mole of catalyst per unit time.

**Table S3:** Product distribution during glucose epimerization over MoS<sub>2</sub> nanosheets with time.

| Time (min) | Conv <sub>Glu</sub> (%) | Yield <sub>Mann</sub> (%) | Yield <sub>Fruc</sub> (%) | Carbon balance (%) | TON  | TOF (×10 <sup>-2</sup> min <sup>-1</sup> ) |
|------------|-------------------------|---------------------------|---------------------------|--------------------|------|--------------------------------------------|
| 30         | 27.0                    | 26.9                      | n.d.                      | 99.6               | 2.69 | 8.9                                        |
| 60         | 31.1                    | 27.2                      | n.d.                      | 87.4               | 2.72 | 4.5                                        |
| 90         | 33.2                    | 28.8                      | 0.1                       | 87.0               | 2.88 | 3.2                                        |
| 120        | 34.7                    | 29.3                      | 0.5                       | 85.9               | 2.93 | 2.4                                        |
| 150        | 35.8                    | 27.9                      | 0.5                       | 79.3               | 2.79 | 1.8                                        |
| 180        | 39.7                    | 27.4                      | 0.5                       | 70.2               | 2.74 | 1.5                                        |
| 210        | 42.0                    | 27.2                      | 0.5                       | 65.9               | 2.72 | 1.3                                        |
| 240        | 43.5                    | 26.8                      | 0.5                       | 62.7               | 2.68 | 1.1                                        |

Conv-conversion, Glu-glucose, Mann-mannose and Fruc-fructose. Reaction conditions: 100 °C, 10% wt. catalyst to glucose in water. N.d.-not detected. TON-turn over number is calculated as moles of reactant consumed per mole of catalyst. TOF-turn over frequency is calculated as moles of reactant consumed per mole of catalyst per unit time.

**Table S4:** Product distribution during glucose epimerization over MoS<sub>2</sub> nanosheets under varying catalyst load conditions.

| <b>Cat. loading (wt. %)</b> | <b><i>Conv<sub>Glu</sub></i> (%)</b> | <b><i>Yield<sub>Mann</sub></i> (%)</b> | <b><i>Yield<sub>Fruc</sub></i> (%)</b> | <b>Carbon balance (%)</b> | <b>TON</b> | <b>TOF (<math>\times 10^{-2} \text{ min}^{-1}</math>)</b> |
|-----------------------------|--------------------------------------|----------------------------------------|----------------------------------------|---------------------------|------------|-----------------------------------------------------------|
| 5.0                         | 34.4                                 | 28.2                                   | n.d.                                   | 81.9                      | 2.82       | 2.3                                                       |
| 10.0                        | 34.7                                 | 29.3                                   | 0.5                                    | 85.9                      | 2.93       | 2.4                                                       |
| 15.0                        | 37.4                                 | 28.8                                   | 0.8                                    | 79.1                      | 2.88       | 2.4                                                       |
| 20.0                        | 41.7                                 | 28.5                                   | 1.2                                    | 71.2                      | 2.85       | 2.3                                                       |

Conv-conversion, Glu-glucose, Mann-mannose and Fruc-fructose. Reaction conditions: 100 °C and 120 min in water. N.d.-not detected. TON-turn over number is calculated as moles of reactant consumed per mole of catalyst. TOF-turn over frequency is calculated as moles of reactant consumed per mole of catalyst per unit time.

**Table S5.** Product distribution during glucose epimerization over MoS<sub>2</sub> nanosheets in different solvent mediums.

| <b>Solvent</b> | <b><i>Conv<sub>Glu</sub></i> (%)</b> | <b><i>Yield<sub>Mann</sub></i> (%)</b> | <b><i>Yield<sub>Fruc</sub></i> (%)</b> | <b>Carbon balance (%)</b> | <b>TON</b> | <b>TOF (<math>\times 10^{-2} \text{ min}^{-1}</math>)</b> |
|----------------|--------------------------------------|----------------------------------------|----------------------------------------|---------------------------|------------|-----------------------------------------------------------|
| MeOH           | 38.8                                 | 25.5                                   | 0.8                                    | 67.8                      | 2.55       | 2.1                                                       |
| EtOH           | 34.2                                 | 25.3                                   | n.d.                                   | 74.0                      | 2.53       | 2.1                                                       |
| IPA            | 44.4                                 | 19.3                                   | n.d.                                   | 43.4                      | 1.93       | 1.6                                                       |
| Water          | 34.7                                 | 29.3                                   | 0.5                                    | 85.9                      | 2.93       | 2.4                                                       |

Conv-conversion, Glu-glucose, Mann-mannose and Fruc-fructose. Reaction conditions: 100 °C, 5% wt. catalyst load on glucose and 120 min. N.d.-not detected and IPA-iso propyl alcohol. TON-turn over number is calculated as moles of reactant consumed per mole of catalyst. TOF-turn over frequency is calculated as moles of reactant consumed per mole of catalyst per unit time.

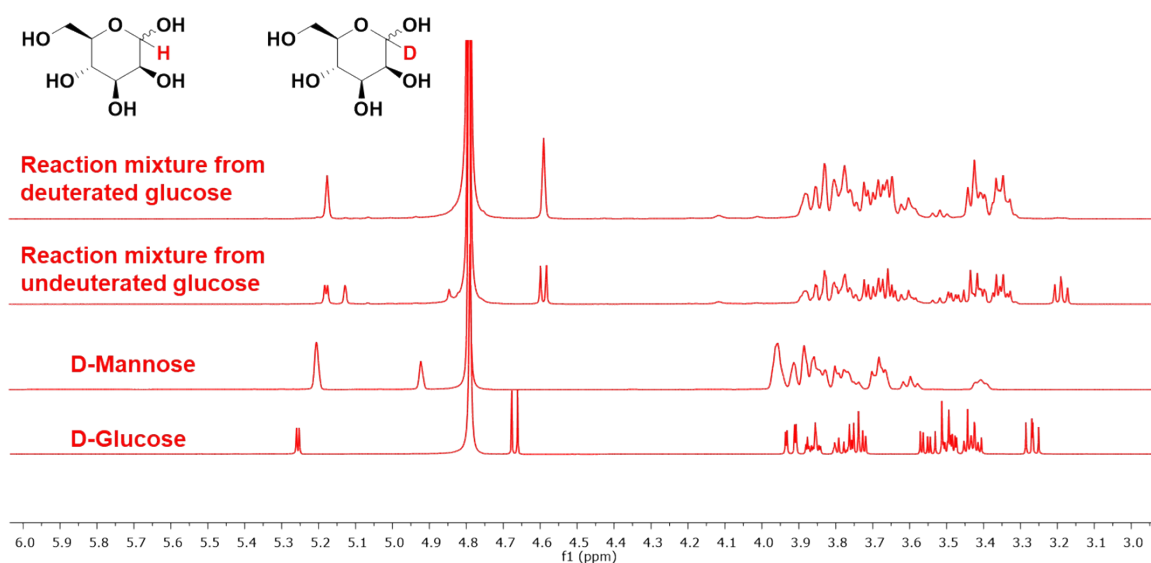

**Figure S4:** Comparative  $^1\text{H}$ -NMR spectra of post-reaction mixtures obtained using labelled and unlabelled glucose (at C2) as a substrate in  $\text{D}_2\text{O}$  and reference sugars.

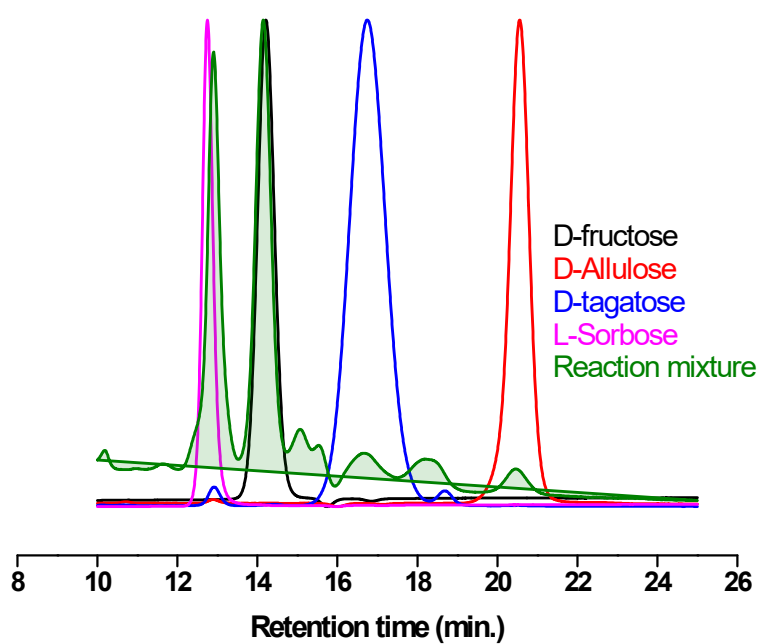

**Figure S5:** Comparative HPLC chromatograms of reference sugars and the post-reaction mixture of fructose epimerization into L-sorbose under optimum conditions.

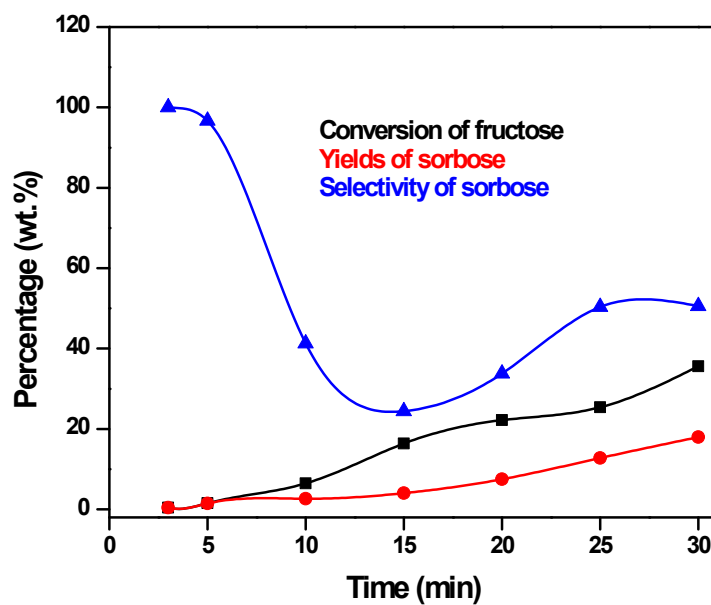

**Figure S6:** Kinetic profile of fructose to L-sorbose epimerization up to 30 minutes (at 130 °C and 20% wt. MoS<sub>2</sub> on fructose) in water.

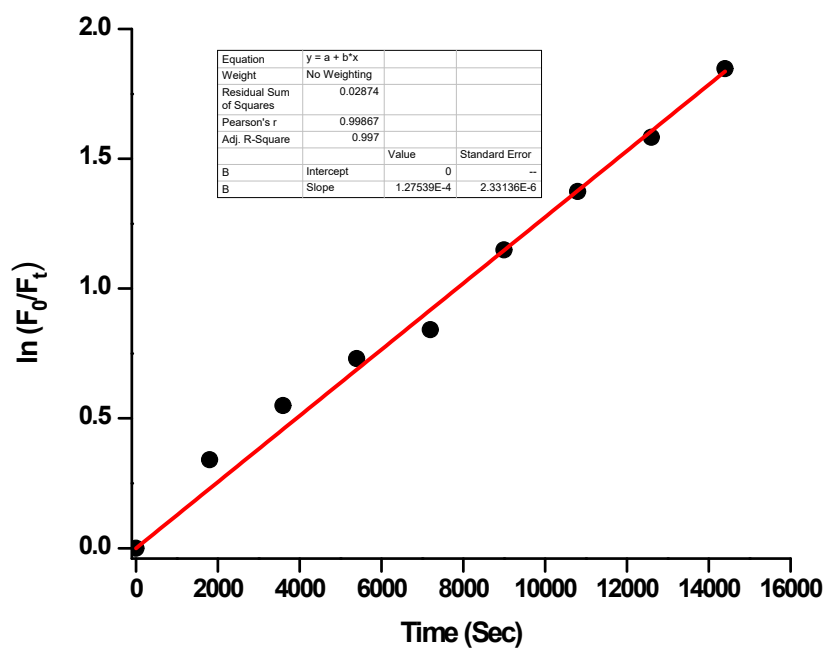

**Figure S7:** Plot of  $\ln[Fru_0/Fru_t]$  vs.  $t$  for first-order rate constant determination.



**Table S6:** Product distribution during fructose epimerization over MoS<sub>2</sub> nanosheets under varying catalyst load conditions.

| MoS <sub>2</sub> load (%) | Conv <sub>Fruc</sub> (%) | Yield <sub>Sorb</sub> (%) | Yield <sub>Taga</sub> (%) | Yield <sub>Allu</sub> (%) | Yield <sub>HMF</sub> (%) | Carbon balance (%) | TON  | TOF (×10 <sup>-2</sup> min <sup>-1</sup> ) |
|---------------------------|--------------------------|---------------------------|---------------------------|---------------------------|--------------------------|--------------------|------|--------------------------------------------|
| 5                         | 34.2                     | 15.9                      | 0.5                       | 0.5                       | 1.2                      | 54.7               | 0.79 | 0.66                                       |
| 10                        | 41.7                     | 21.1                      | 1.7                       | 1.0                       | 2.7                      | 66.8               | 1.05 | 0.87                                       |
| 15                        | 51.3                     | 21.7                      | 1.6                       | 0.8                       | 3.2                      | 56.3               | 1.08 | 0.90                                       |
| 20                        | 56.4                     | 22.0                      | 1.3                       | 0.7                       | 4.1                      | 53.4               | 1.10 | 0.91                                       |

Conv-conversion, Fruc-fructose, Sorb-sorbose, Allu-allulose and Taga-tagatose. Reaction conditions: 100 °C and 120 min in water. N.d.-not detected. TON-turn over number is calculated as moles of reactant consumed per mole of catalyst. TOF-turn over frequency is calculated as moles of reactant consumed per mole of catalyst per unit time.

**Table S7:** Product distribution during fructose epimerization over MoS<sub>2</sub> nanosheets with respect to temperature.

| Temp (°C) | Conv <sub>Fruc</sub> (%) | Yield <sub>Sorb</sub> (%) | Yield <sub>Taga</sub> (%) | Yield <sub>Allu</sub> (%) | Yield <sub>HMF</sub> (%) | Carbon balance (%) | TON  | TOF (×10 <sup>-2</sup> min <sup>-1</sup> ) |
|-----------|--------------------------|---------------------------|---------------------------|---------------------------|--------------------------|--------------------|------|--------------------------------------------|
| 80        | 21.7                     | 8.3                       | 0.2                       | n.d.                      | 1.2                      | 47.4               | 0.41 | 0.34                                       |
| 90        | 25.0                     | 9.7                       | 0.5                       | n.d.                      | 1.7                      | 50.9               | 0.48 | 0.40                                       |
| 100       | 41.7                     | 21.1                      | 0.9                       | 0.1                       | 2.2                      | 60.9               | 1.05 | 0.87                                       |
| 110       | 43.9                     | 21.7                      | 1.1                       | 0.2                       | 2.3                      | 60.2               | 1.08 | 0.90                                       |
| 120       | 45.3                     | 22.1                      | 1.3                       | 0.6                       | 2.5                      | 61.2               | 1.10 | 0.92                                       |
| 130       | 52.3                     | 26.3                      | 1.7                       | 1.0                       | 2.7                      | 63.2               | 1.31 | 1.09                                       |
| 140       | 63.1                     | 25.9                      | 1.8                       | 0.9                       | 3.2                      | 52.9               | 1.29 | 1.07                                       |
| 150       | 73.9                     | 21.9                      | 2.6                       | 1.6                       | 4.8                      | 45.0               | 1.09 | 0.90                                       |

Conv-conversion, Fruc-fructose, Sorb-sorbose Allu-allulose and Taga-tagatose. Reaction conditions: 10% wt. catalyst to fructose for 120 mins in water. N.d.-not detected. TON-turn over number is calculated as moles of reactant consumed per mole of catalyst. TOF-turn over frequency is calculated as moles of reactant consumed per mole of catalyst per unit time.

**Table S8:** Product distribution during fructose epimerization over MoS<sub>2</sub> nanosheets with time.

| <b>Time (min)</b> | <b>Conv<sub>Fruc</sub> (%)</b> | <b>Yield<sub>Sorb</sub> (%)</b> | <b>Yield<sub>Taga</sub> (%)</b> | <b>Yield<sub>Allu</sub> (%)</b> | <b>Yield<sub>HMF</sub> (%)</b> | <b>Carbon balance (%)</b> | <b>TON</b> | <b>TOF (×10<sup>-2</sup> min<sup>-1</sup>)</b> |
|-------------------|--------------------------------|---------------------------------|---------------------------------|---------------------------------|--------------------------------|---------------------------|------------|------------------------------------------------|
| 30                | 35.6                           | 18.0                            | 0.9                             | n.d.                            | n.d.                           | 53.0                      | 0.90       | 3.0                                            |
| 60                | 45.6                           | 22.8                            | 1.4                             | 0.5                             | 2.5                            | 62.3                      | 1.14       | 1.9                                            |
| 90                | 51.8                           | 25.9                            | 1.7                             | 0.8                             | 3.5                            | 64.9                      | 1.29       | 1.4                                            |
| 120               | 52.3                           | 26.3                            | 1.8                             | 1.0                             | 2.7                            | 63.3                      | 1.31       | 1.0                                            |
| 150               | 68.3                           | 23.4                            | 2.4                             | 1.2                             | 4.0                            | 48.3                      | 1.17       | 0.8                                            |
| 180               | 74.6                           | 21.3                            | 2.9                             | 1.0                             | 5.8                            | 45.4                      | 1.06       | 0.6                                            |
| 210               | 79.4                           | 18.7                            | 2.6                             | 1.1                             | 6.0                            | 39.5                      | 0.93       | 0.4                                            |
| 240               | 84.2                           | 15.4                            | 2.4                             | 1.2                             | 6.1                            | 33.4                      | 0.77       | 0.3                                            |

Conv-conversion, Fruc-fructose, Sorb-sorbose Allu-allulose and Taga-tagatose. Reaction conditions: 130 °C, 10% wt. catalyst to fructose in water. N.d.-not detected. TON-turn over number is calculated as moles of reactant consumed per mole of catalyst. TOF-turn over frequency is calculated as moles of reactant consumed per mole of catalyst per unit time.

**Table S9:** Product distribution during fructose epimerization over MoS<sub>2</sub> nanosheets in different solvent mediums.

| <b>Temp (°C)</b>  | <b>Conv<sub>Fruc</sub> (%)</b> | <b>Yield<sub>Sorb</sub> (%)</b> | <b>Yield<sub>Taga</sub> (%)</b> | <b>Yield<sub>Allu</sub> (%)</b> | <b>Yield<sub>HMF</sub> (%)</b> | <b>Carbon balance (%)</b> | <b>TON</b> | <b>TOF (×10<sup>-2</sup> min<sup>-1</sup>)</b> |
|-------------------|--------------------------------|---------------------------------|---------------------------------|---------------------------------|--------------------------------|---------------------------|------------|------------------------------------------------|
| MeOH              | 26.2                           | 9.0                             | 0.1                             | n.d.                            | 2.2                            | 47.3                      | 0.45       | 0.37                                           |
| EtOH              | 31.7                           | 6.9                             | n.d.                            | n.d.                            | 2.0                            | 31.2                      | 0.34       | 0.28                                           |
| W: M <sup>a</sup> | 28.7                           | 14.3                            | n.d.                            | 0.3                             | 2.1                            | 61.8                      | 0.72       | 0.59                                           |
| W: E <sup>b</sup> | 29.8                           | 11.3                            | n.d.                            | 0.2                             | 1.5                            | 46.1                      | 0.56       | 0.47                                           |
| Water             | 52.3                           | 26.3                            | 1.7                             | 1.0                             | 2.7                            | 63.1                      | 1.32       | 1.09                                           |

Conv-conversion, Fruc-fructose, Sorb-sorbose Allu-allulose and Taga-tagatose. Reaction conditions: 130 °C, 10% wt. catalyst to fructose and 120 min. N.d.-not detected. <sup>a</sup>Water:Methanol (1:1 v/v) and <sup>b</sup>Water:Ethanol (1:1 v/v). TON-turn over number is calculated as moles of reactant consumed per mole of catalyst. TOF-turn over frequency is calculated as moles of reactant consumed per mole of catalyst per unit time.

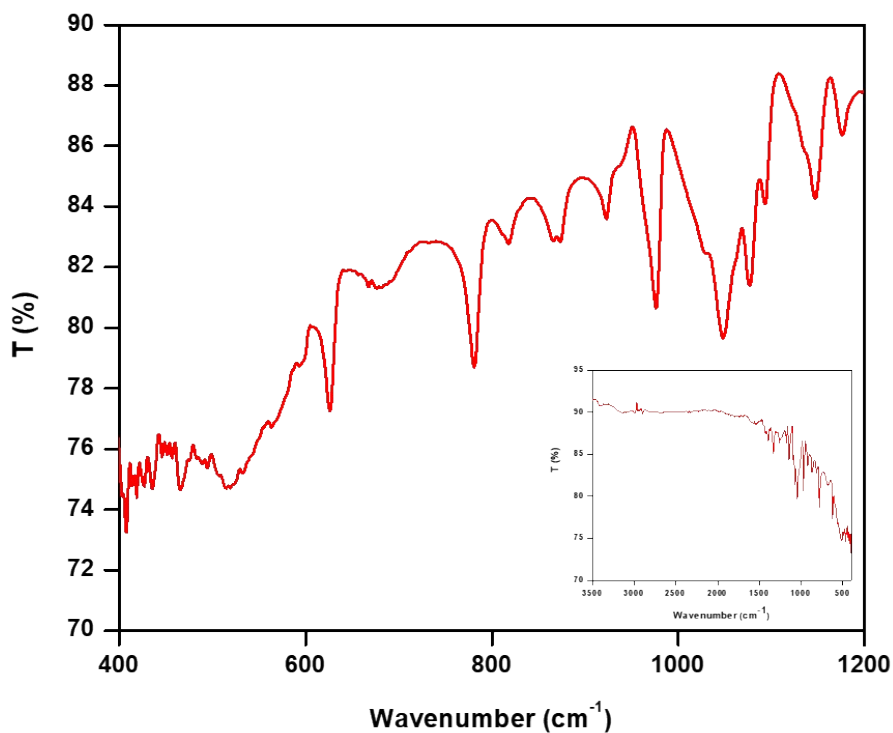

**Figure S8:** In-situ ATR-FTIR spectrum of fructose to sorbose epimerisation reaction with MoS<sub>2</sub> nanosheet in the 400-1200 cm<sup>-1</sup> range. Inset: full spectrum. (Reaction conditions: 20 wt.% catalyst loading on sugar, 1 h, 130 °C in water).

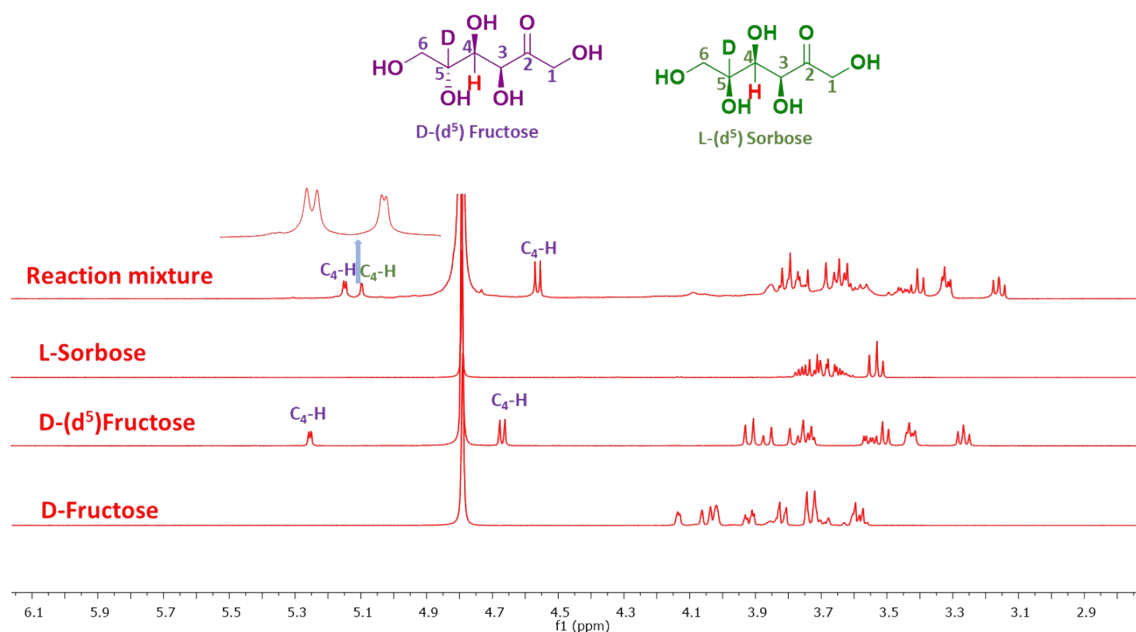

**Figure S9:** Comparative <sup>1</sup>H-NMR spectra of post-reaction mixtures obtained when using labelled and unlabelled glucose (at C2) as a substrate in D<sub>2</sub>O along with reference sugars.

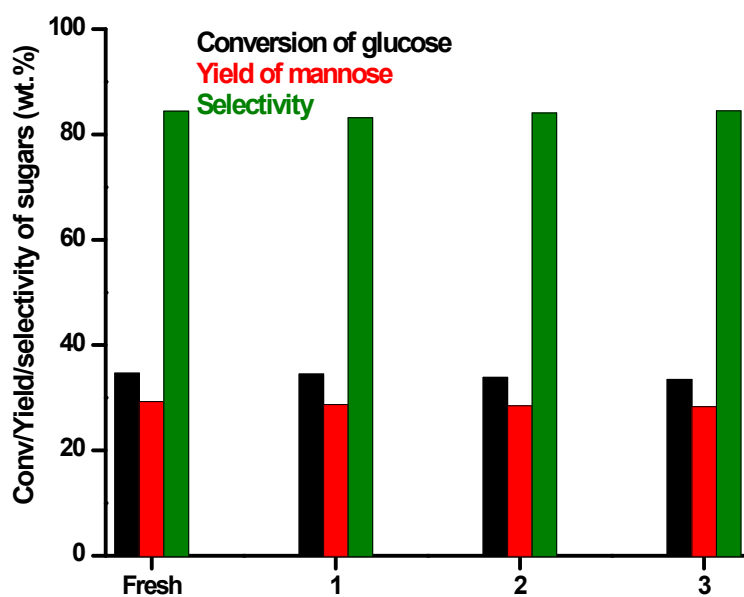

**Figure S10:** Result of catalyst recycling during glucose into mannose epimerization under optimum conditions. (Reaction condition: solvent-water, temperature 100 °C, concentration of glucose 50 mg, time 2 h, catalyst dosage 5 mg).

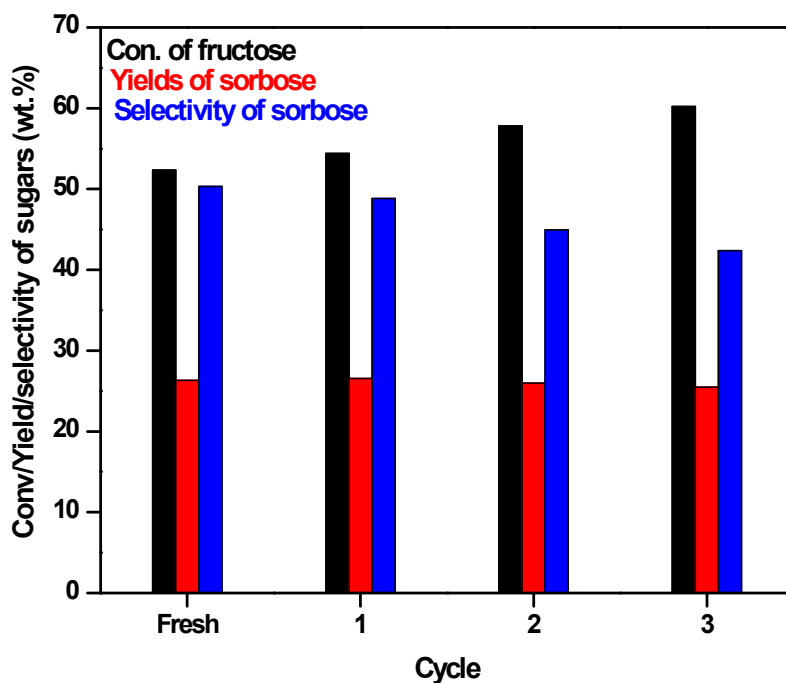

**Figure S11:** Result of catalytic efficiency of MoS<sub>2</sub> in fructose epimerization to L-sorbose under optimum conditions in water. (Reaction condition: solvent-water, temperature 130 °C, concentration of fructose 50 mg, time 2 h, catalyst dosage 10 mg).

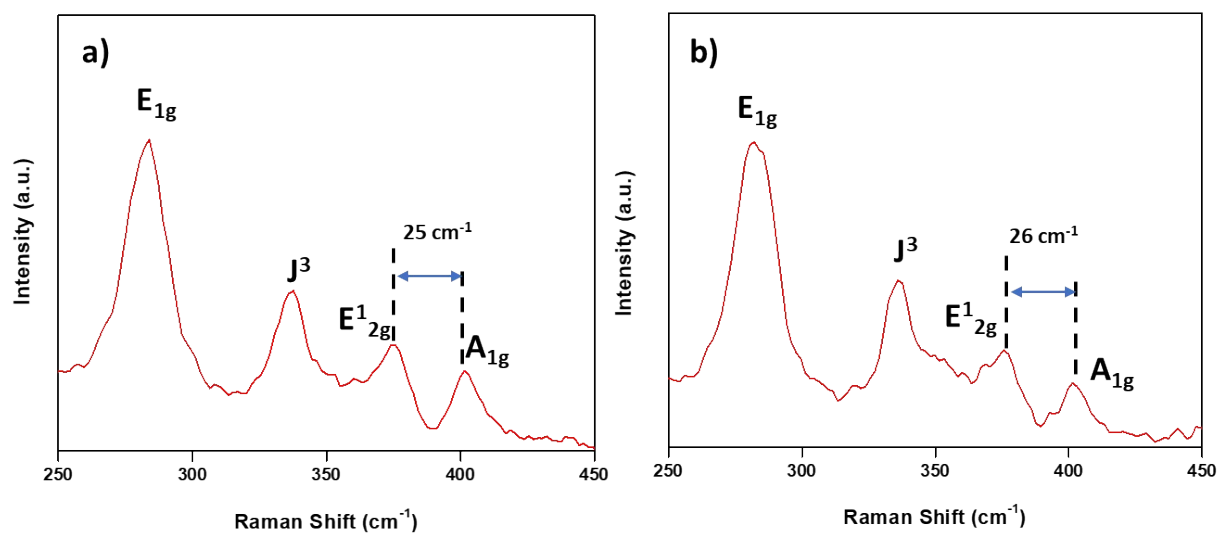

**Figure S12:** Raman spectra of recovered catalyst from (a) glucose epimerization reaction and (b) fructose epimerization reaction.

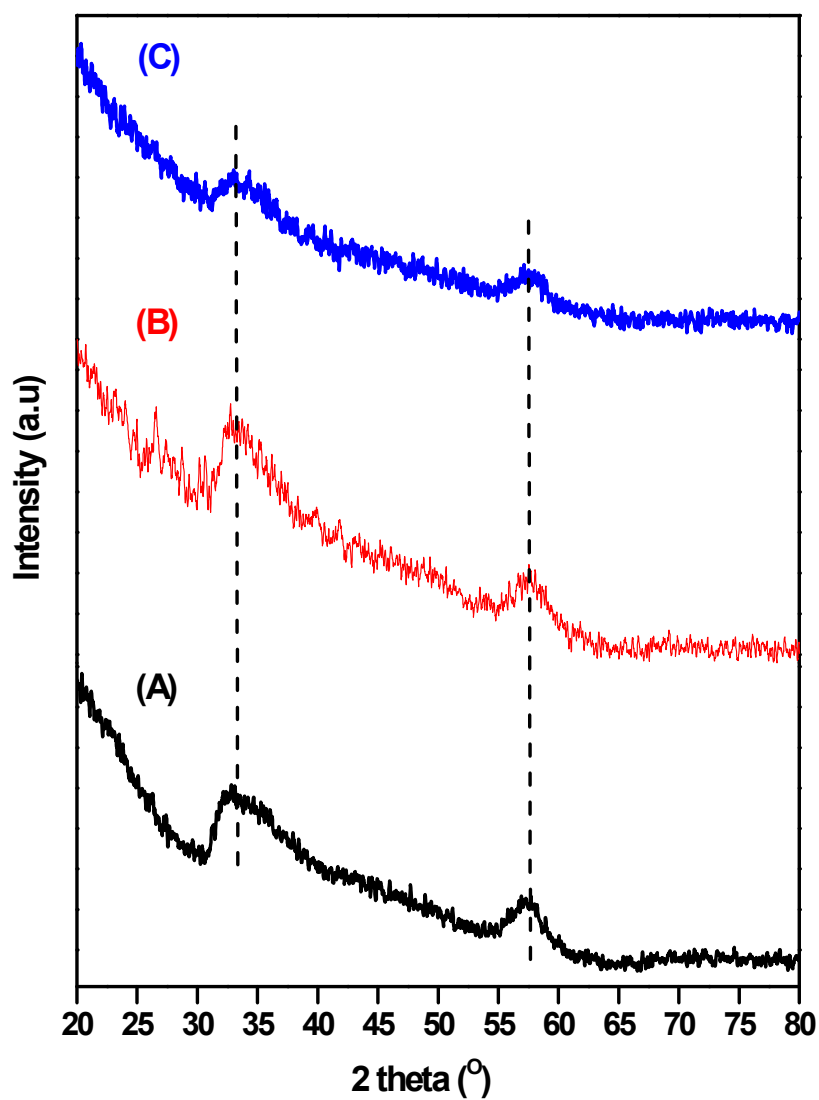

**Figure S13:** Comparative XRD results: (a) as-synthesized MoS<sub>2</sub> (fresh), (b) recovered MoS<sub>2</sub> after three cycles of glucose epimerization to mannose, and (c) recovered MoS<sub>2</sub> after three cycles of fructose epimerization to sorbose.

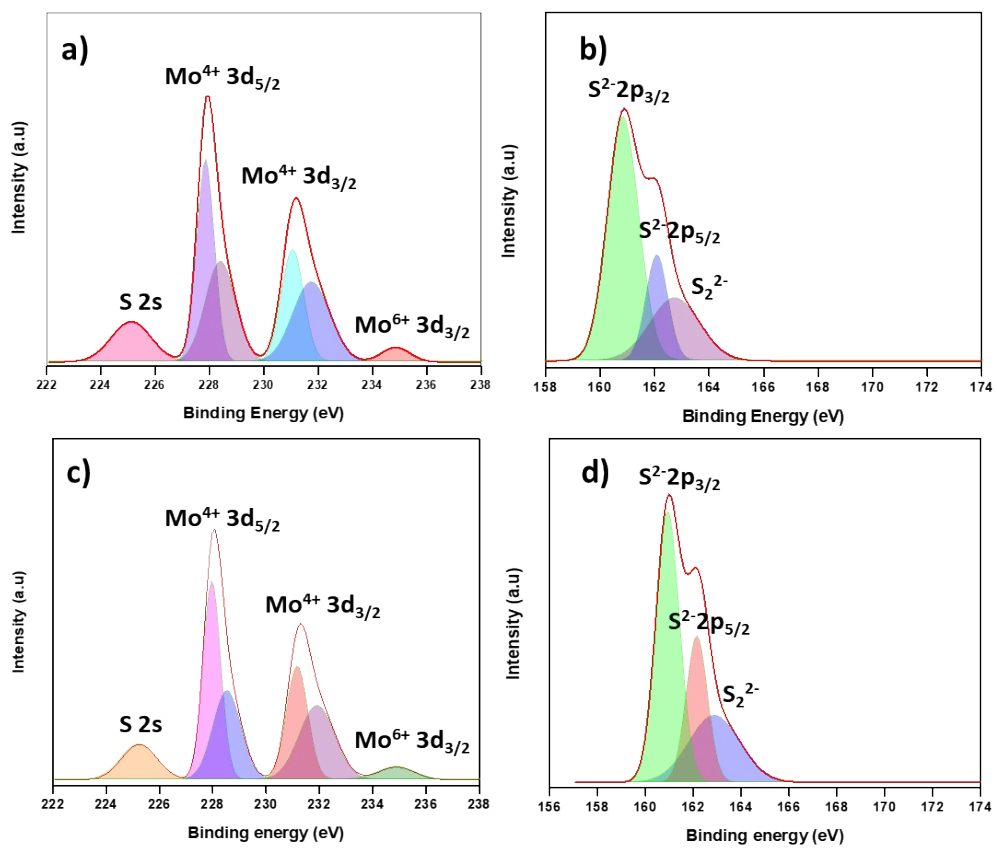

**Figure S14:** XPS spectra of recovered catalyst from glucose epimerisation reaction (a & b) and fructose epimerisation reaction (c & d).

**Table S10:** Green metrics of glucose and fructose epimerization reactions over MoS<sub>2</sub> nanosheets.

| <b>Green metric parameters</b>    | <b>Ideal value</b> | <b>Process: Glucose epimerisation</b> | <b>Process: Fructose epimerization</b> |
|-----------------------------------|--------------------|---------------------------------------|----------------------------------------|
| E-Factor                          | 0.0                | 3.4                                   | 3.8                                    |
| Process Mass Intensity (PMI)      | 1.0                | 3.3                                   | 3.1                                    |
| Mass Productivity (MP, %)         | 100.0              | 29.8                                  | 31.8                                   |
| Carbon Efficiency (CE, %)         | 100.0              | 29.3                                  | 26.3                                   |
| Atom Economy (AE, %)              | 100.0              | 100.0                                 | 100.0                                  |
| Reaction Mass Efficiency (RME, %) | 100.0              | 29.8                                  | 31.8                                   |



**Table S11:** Penalty points of epimerization of glucose and fructose reactions to calculate E-scale values.

| Parameters                                                             | Penalty points    |                       |                        |
|------------------------------------------------------------------------|-------------------|-----------------------|------------------------|
|                                                                        | Ideal             | Glucose epimerization | Fructose epimerization |
| Yield                                                                  | (100 – % yield)/2 | 35                    | 37                     |
| <b>Price of reaction components (to obtain 10 mmol of end product)</b> |                   |                       |                        |
| Inexpensive (< \$10)                                                   | 0                 | 0                     | 0                      |
| Expensive (> \$10 and < \$50)                                          | 3                 | -                     | -                      |
| Very expensive (> \$50)                                                | 5                 | 5                     | 5                      |
| <b>Safety<sup>a</sup></b>                                              |                   |                       |                        |
| N (dangerous for environment)                                          | 5                 | -                     | -                      |
| T (toxic)                                                              | 5                 | -                     | -                      |
| F (highly flammable)                                                   | 5                 | -                     | -                      |
| E (explosive)                                                          | 10                | -                     | -                      |
| F+ (extremely flammable)                                               | 10                | -                     | -                      |
| T+ (extremely toxic)                                                   | 10                | -                     | -                      |
| <b>Technical setup</b>                                                 |                   |                       |                        |
| Common setup                                                           | 0                 | 0                     | 0                      |
| Instruments for controlled addition of chemicals <sup>b</sup>          | 1                 | -                     | -                      |
| Unconventional activation technique <sup>c</sup>                       | 2                 | -                     | -                      |
| Pressure equipment, > 1 atm <sup>d</sup>                               | 3                 | -                     | -                      |
| Any additional special glassware                                       | 1                 | -                     | -                      |
| (Inert) gas atmosphere                                                 | 1                 | -                     | -                      |
| Glove box                                                              | 3                 | -                     | -                      |
| <b>Temperature/time</b>                                                |                   |                       |                        |
| Room temperature, < 1 h                                                | 0                 | 0                     | 0                      |
| Room temperature, < 24 h                                               | 1                 | -                     | -                      |
| Heating, < 1 h                                                         | 2                 | -                     | -                      |
| Heating, > 1 h                                                         | 3                 | 3                     | 3                      |
| Cooling to 0°C                                                         | 4                 | -                     | -                      |
| Cooling, < 0°C                                                         | 5                 | -                     | -                      |
| <b>Workup and purification</b>                                         |                   |                       |                        |
| None                                                                   | 0                 | 0                     | 0                      |
| Cooling to room temperature                                            | 0                 | 0                     | 0                      |
| Adding solvent                                                         | 0                 | 0                     | 0                      |
| Simple filtration                                                      | 0                 | 0                     | 0                      |
| Removal of solvent with bp < 150°C                                     | 0                 | 0                     | 0                      |
| Crystallization and filtration                                         | 1                 | -                     | -                      |
| Removal of solvent with bp > 150°C                                     | 2                 | -                     | -                      |
| Solid phase extraction                                                 | 2                 | -                     | -                      |
| Distillation                                                           | 3                 | -                     | -                      |
| Sublimation                                                            | 3                 | -                     | -                      |
| Liquid-liquid extraction <sup>e</sup>                                  | 3                 | -                     | -                      |
| Classical chromatography                                               | 10                | 10                    | 10                     |
| <b>Total</b>                                                           |                   | <b>53</b>             | <b>55</b>              |

<sup>a</sup>Water:Methanol; <sup>b</sup>Special items, like dropping funnel, syringe pump, high-pressure gas regulator, etc.;

<sup>c</sup>Microwave irradiation, ultrasound or photochemical activation, etc.; <sup>d</sup>high-pressure hydrogenation equipment, etc.; <sup>e</sup>Solvent drying process (filtration and desiccation).
